# Supplementary material for: The transition to new ozone absorption cross-sections for Dobson and Brewer total ozone measurements
Source: Copernicus journal article supplement (doi:10.5194/amt-2023-220), 2023-11-24
Supplement: Supplementary file 1 [file amt-2023-220-supplement.pdf]

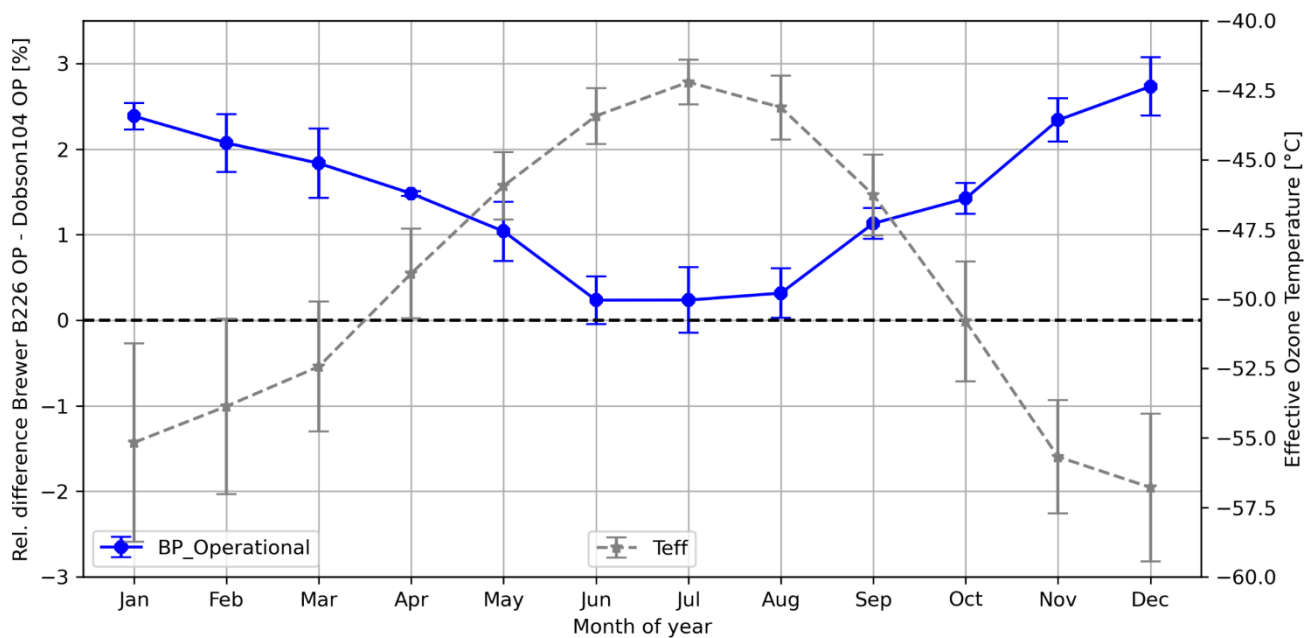

5 **Figure S 1: Monthly mean (2017 – 2020) difference between Brewer226 and Dobson104 (blue line), using the operational Bass and Paar ozone absorption cross sections with fixed  $T_{\text{eff}}$ . The dashed grey line represents the typical monthly mean effective ozone temperature ( $T_{\text{eff}}$ ). The error bars represent the standard deviation over each month.**

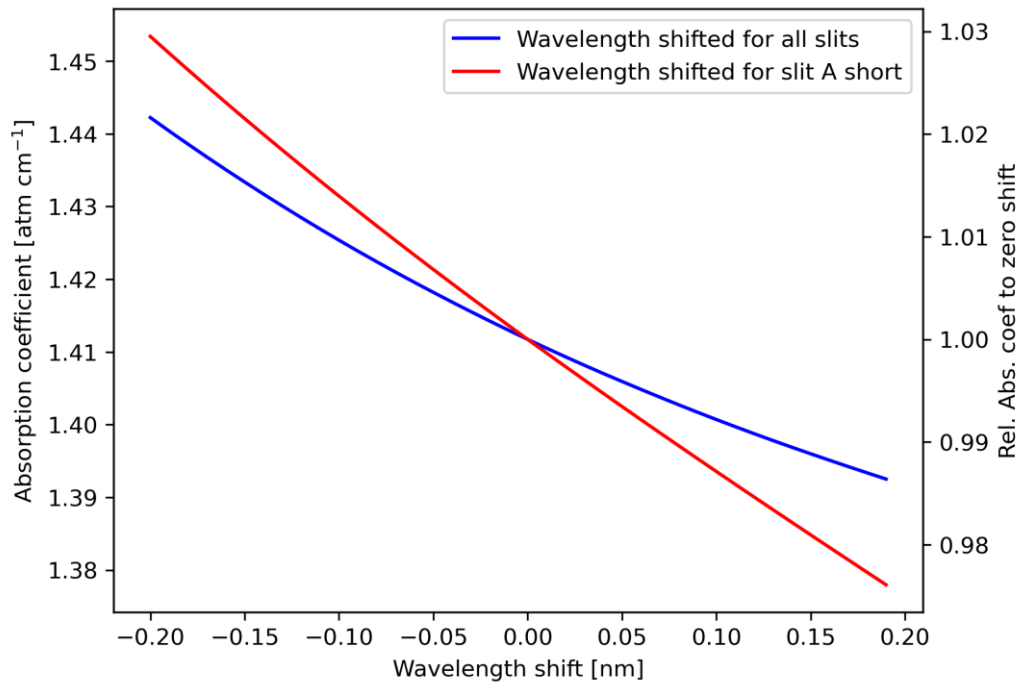

**Figure S 2: Influence of Wavelength Shift on calculated absorption coefficient for TuPS Measurements.**

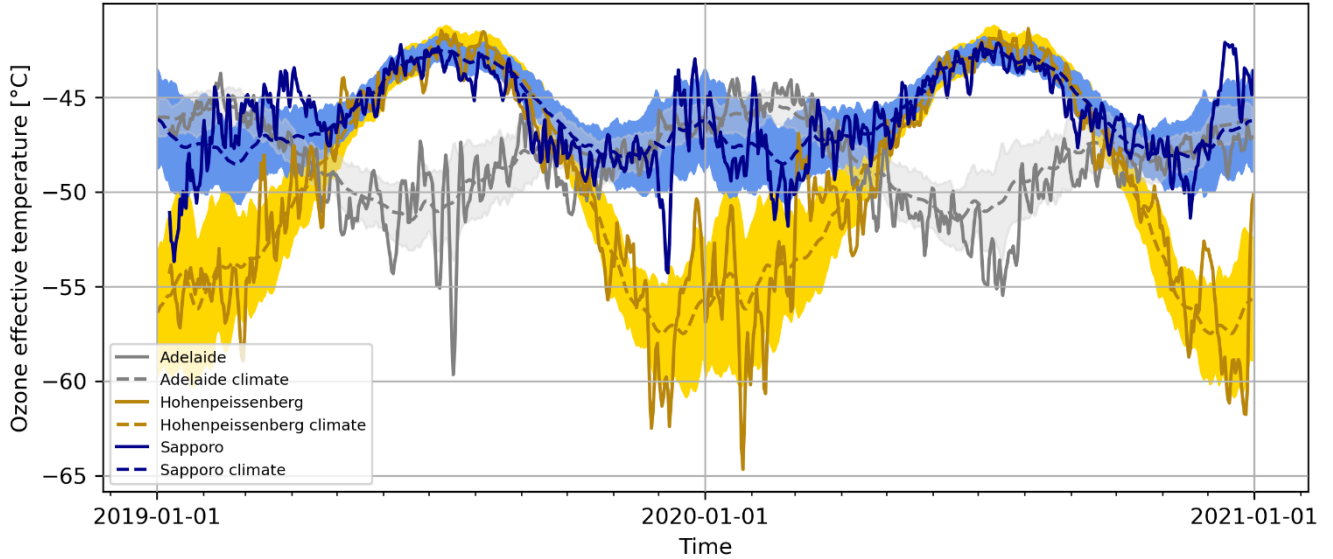

**Figure S 3: Timeseries of TEMIS-derived ozone effective temperature  $T_{\text{eff}}$  for three additional locations. The dashed lines indicate the long-term climatology (1990-2020), and the shaded areas indicate the year to year variability for each day of year ( $1 \sigma$ ).**

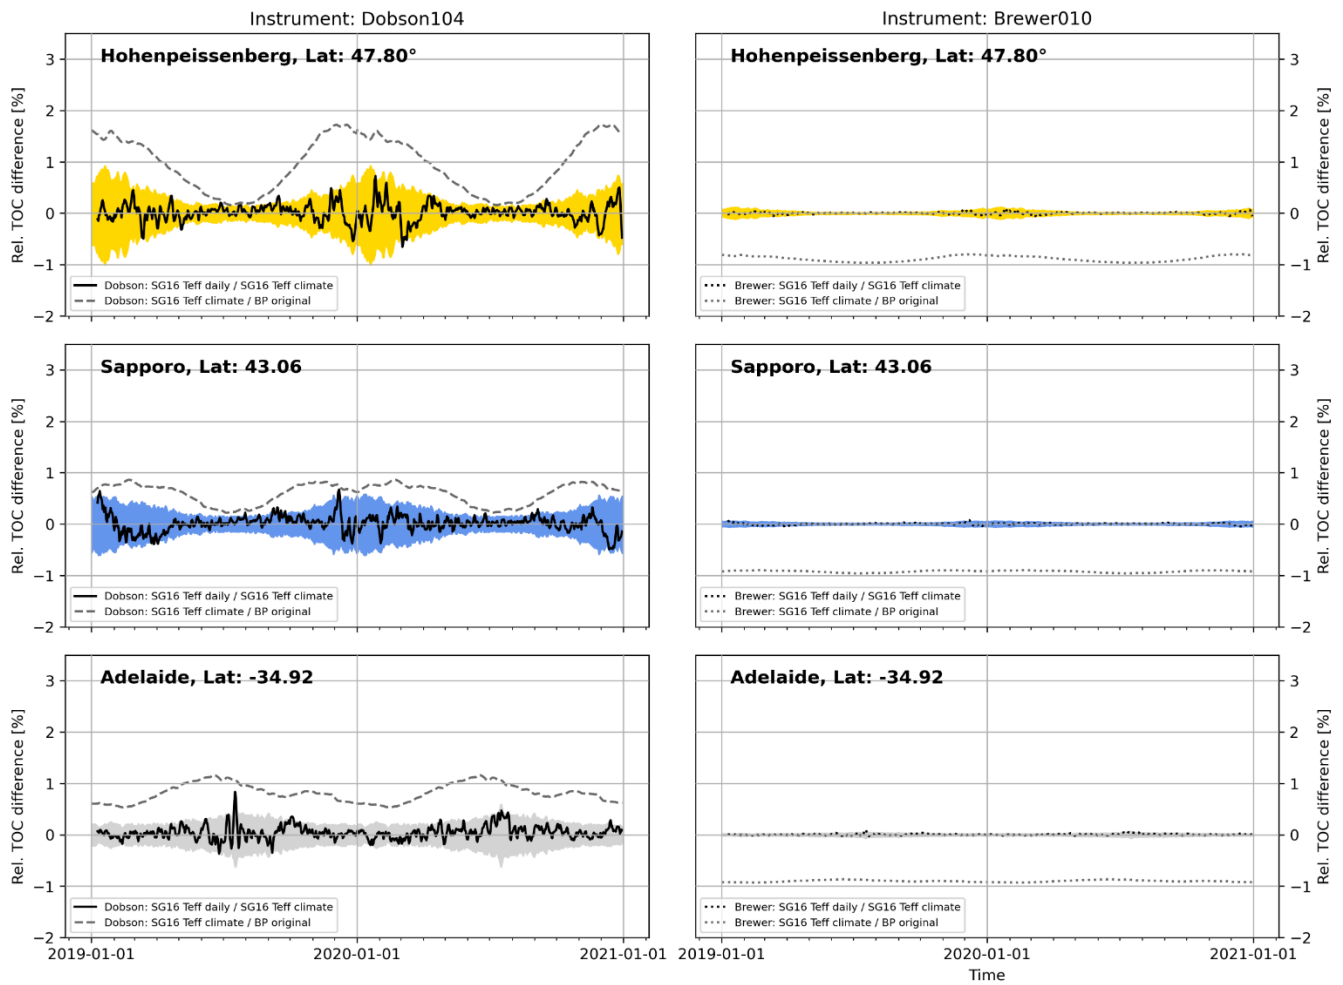

15 **Figure S 4: Relative difference in TOC between new Teff dependent ozone cross sections (SG16, TEMIS climate) and fixed**  
**temperature B&P cross sections (grey dashed lines), and between daily and climatological values for Teff (colored shaded regions,**  
**SG16 cross section, Teff daily and climatological from TEMIS). Results are given for three locations and Dobson (left panels) and**  
**Brewer (right panels). The shaded areas show the potential difference in TOC (2  $\sigma$ ) when using climatological  $T_{\text{eff}}$  (1990 – 2020)**  
**instead of daily TEMIS values. Bernhard slit approximation was used for the Dobson instrument. For the Brewer, the slit functions**  
**from Brewer010 as described in Table 2 were applied.**

20

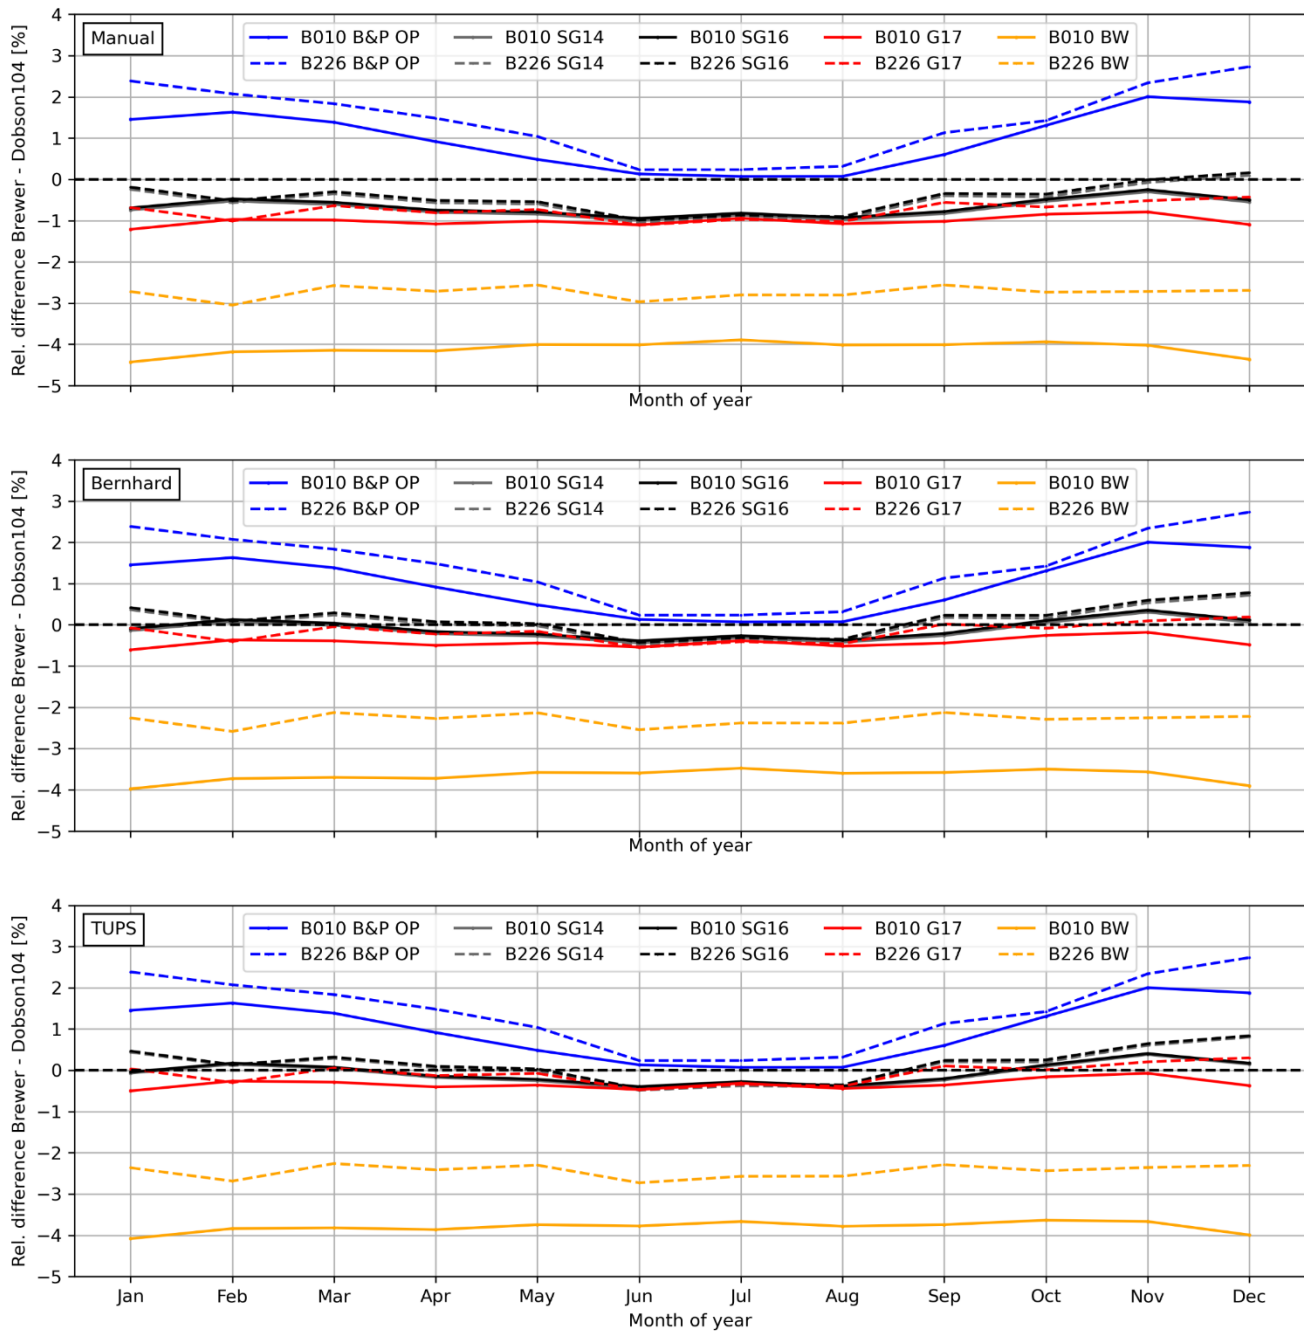

25 **Figure S 5: Monthly mean difference between Brewers 010/226 (solid, dashed) and Dobson104. The three panels show the results for different slit parametrizations for the Dobson instrument. The different colors represent the results obtained using the various ozone absorption cross sections.**

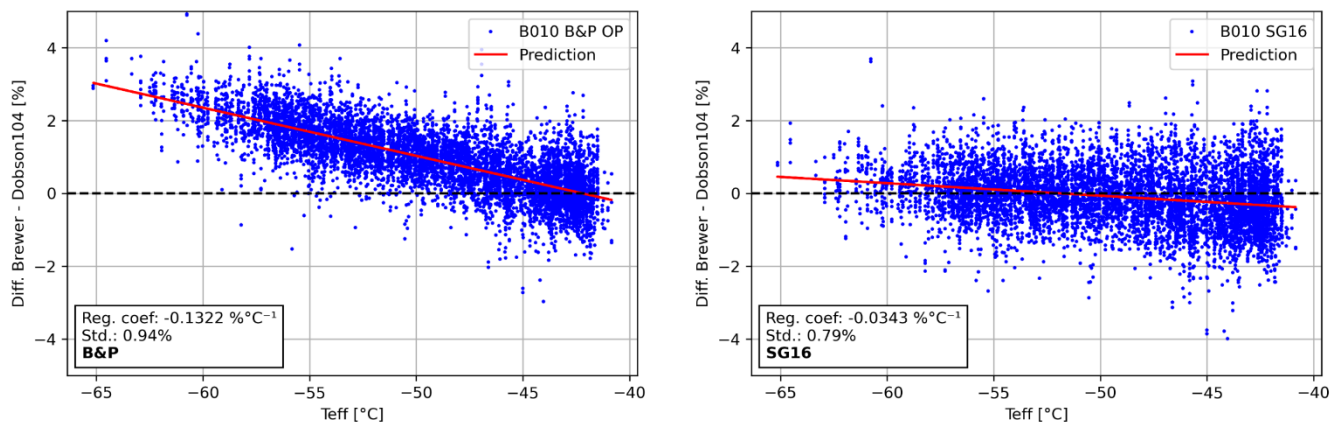

30 **Figure S 6: Relative differences between Brewer 010 and Dobson 104 with respect to ozone effective temperature ( $T_{\text{eff}}$ ). The left panel illustrates the differences using the operational B&P cross sections without accounting for varying  $T_{\text{eff}}$  values, while the right panel displays the relative differences using the SG16 cross section dataset and accounting for  $T_{\text{eff}}$  variations. The red line represents the linear fit through the data points. The statistical values of the regression line and the standard deviation ( $1 \sigma$ ) are presented in the figure's boxes.**

A summary of the annual variation in the difference between Dobson104 and the two Brewer instruments is given in Table S  
 35 1. The temperature dependency in the right columns is based on a linear fit to the observed differences versus  $T_{\text{eff}}$  (Fig. S6). The BW dataset produces a large offset between TOC values from the two instrument types. It is not recommended for implementation in operational networks.

Among the remaining three datasets, the SG14/SG16 cross sections produce the best results for the annually varying difference between the instrument types, with a mean difference of less than 0.14 % (column “mean”). The G17 dataset produces the  
 40 smallest seasonal variation (column “Std. Dev.”). The remaining temperature dependency of the difference between the instruments is similar to the values reported by Gröbner et al. (2021), who found values ranging from  $-0.03 \text{ \%K}^{-1}$  to  $0.00 \text{ \%K}^{-1}$  for the SG14/SG16 dataset, and values ranging from  $-0.00 \text{ \%K}^{-1}$  to  $0.02 \text{ \%K}^{-1}$  for the BW dataset.

45 **Table S 1: Mean difference (%), standard deviation (%) and temperature dependency ( $\text{\% } ^\circ\text{C}^{-1}$ ) of the relative total column ozone differences between the two Brewer instruments and the Dobson104 for five distinct ozone cross section datasets. The B&P dataset reflects operational measurements without  $T_{\text{eff}}$ -correction applied. The mean and standard deviation values are derived from monthly measurements presented in Fig. 8 for the Bernhard slit approximation, while the temperature dependency is calculated using all available paired measurements (see also Fig. S6).**

| Brewer /<br>Dobson104 | Brewer010 |           |                  | Brewer226 |           |                  |
|-----------------------|-----------|-----------|------------------|-----------|-----------|------------------|
|                       | Mean      | Std. Dev. | Temp. dependency | Mean      | Std. Dev. | Temp. dependency |
| B&P                   | 0.99      | 0.68      | -0.13            | 1.44      | 0.83      | -0.16            |
| SG14                  | -0.13     | 0.22      | -0.03            | 0.08      | 0.36      | -0.05            |
| SG16                  | -0.08     | 0.22      | -0.03            | 0.14      | 0.36      | -0.05            |
| G17                   | -0.43     | 0.11      | -0.00            | -0.18     | 0.23      | -0.02            |
| BW                    | -3.66     | 0.15      | 0.02             | -2.30     | 0.15      | -0.00            |

\* Applying Bodhaine’s Rayleigh cross-section (Bodhaine et al., 1999) decreases the TOC values obtained from Brewer and Dobson instruments by approximately -2.61 DU and -0.45 DU, respectively (based on Gröbner et al., 2021). This would lead to a deviation of about -0.67% when comparing

50 Brewer and Dobson measurements.
